# Supplementary material for: Systematic analysis of the ability of Nitric Oxide donors to dislodge biofilms formed by Salmonella enterica and Escherichia coli O157:H7
Source: PubMed Central journal article supplement (PMC4070026; doi:10.1186/s13568-014-0042-y), 2014-06-05
Supplement: s13568-014-0042-y-S1.pdf [file s13568-014-0042-y-S1.pdf]

## Supplementary File

Article title: Systematic analysis of the ability of Nitric Oxide donors to dislodge biofilms formed by *Salmonella enterica* and *Escherichia coli* O157:H7

Journal Name: AMB Express

Authors and Affiliations: Massimiliano Marvasi<sup>1</sup>, Charles Chen<sup>2</sup>, Manuel Carrazana<sup>2</sup>, Ian A. Durie<sup>1</sup> and Max Teplitski<sup>1\*</sup>

<sup>1</sup> Soil and Water Science Department, University of Florida-IFAS

<sup>2</sup> Microbiology and Cell Science Department, University of Florida-IFAS

\*Corresponding author. Email address: [maxtep@ufl.edu](mailto:maxtep@ufl.edu); phone: (352) 273-8189

Mailing address: Cancer and Genetics Research Center, 2033 Mowry Road, Genetics Institute, Gainesville, FL, USA 32611

# Biofilm formation on different plastics by different pathogens

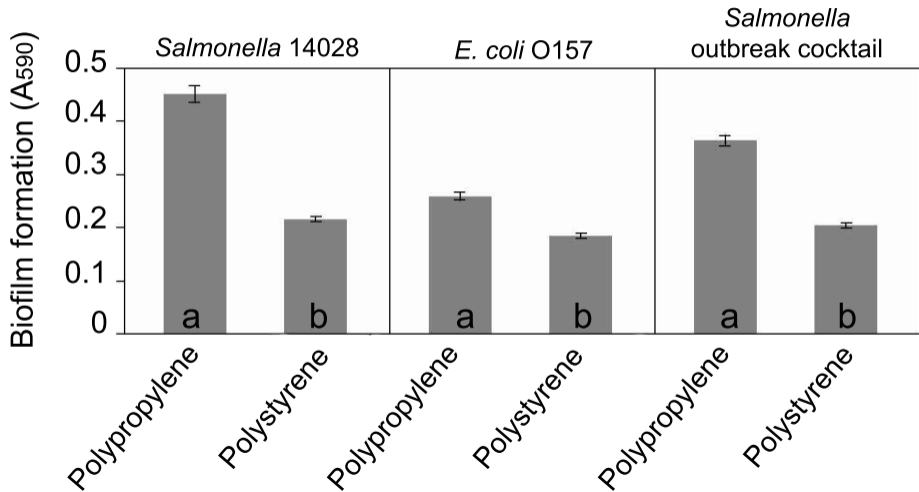

**Supplemental Material - Figure S1. Biofilm formation on different plastics by *Salmonella* and *E. coli* O157:H7.** Biofilms were established on polypropylene and polystyrene surfaces in CFA medium for 24 hrs and stained with 1 % crystal violet and then washed. The absorbed crystal violet and the biofilm were dissolved in 33% acetic acid and A590 was measured with a spectrophotometer. Error bars represent standard error. Significant different means are displayed with different letters.

# Luminescence of *Salmonella* 14028 pTIM2442 after molsidomine treatment

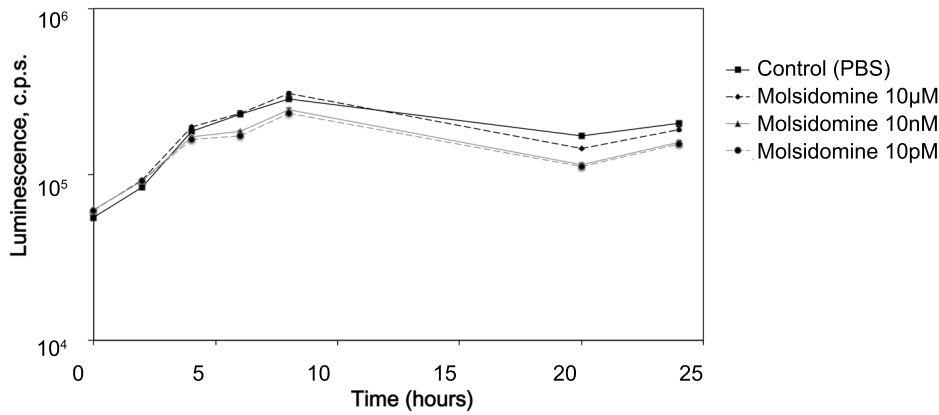

**Supplemental Material – Figure S2. Luminescence of *Salmonella* 14028 pTIM2442 upon exposure to molsidomine.** General metabolic state of the cells was assessed using the redox-coupled FMNH<sub>2</sub>/Luciferase produced by a *S. Typhimurium* ATCC14028 strain harboring high copy number plasmid in which the *luxCDABE* operon is under the phage  $\lambda$  promoter (pTIM2442). Concentrations of molsidomine to which cultures of *Salmonella* 14028 pTIM2442 were exposed are listed on the figure. Error bars represent the standard error of 12 replicas.

**Supplementary Table S1. Fluorescence of the *Salmonella* cells detached by molsidomine treatment**

Measurement of *Salmonella* 14028 planktonic cells detached from preformed biofilm during treatment with molsidomine. polypropylene

| Conc.                                   | Log (Fluorescence 485nm/535nm) |               |               | P<0.05  |
|-----------------------------------------|--------------------------------|---------------|---------------|---------|
|                                         | 0 hours                        | 3 hours       | 6 hours       |         |
| <i>Biofilms formed on polypropylene</i> |                                |               |               |         |
| 0                                       | 4.335 ± 0.065                  | n.a.          | 4.450 ± 0.177 | 0.5492  |
| 10 µM                                   | 4.307 ± 0.067                  | 4.846 ± 0.054 | 4.466 ± 0.080 | <.0001* |
| 10 nM                                   | 4.275 ± 0.055                  | 4.780 ± 0.050 | 4.753 ± 0.075 | <.0001* |
| 10 pM                                   | 4.355 ± 0.064                  | 4.815 ± 0.125 | 5.002 ± 0.144 | 0.0024* |

\*Statistically significant effects (p<0.05) of molsidomine treatment.

**Supplementary Table S2.** The complete set of experiments on the effect of the NO donors on preformed biofilm after 24 hours of contact time.

| <b>NOD</b> | <b>Material</b> | <b>Strain</b>              | <b>Incubation temperature</b> | <b>Prob&gt;F (p=0.05)</b> |
|------------|-----------------|----------------------------|-------------------------------|---------------------------|
| D184       | Polypropylene   | <i>Salmonella</i> 14028    | 4°C                           | <0.0001                   |
| D184       | Polypropylene   | <i>Salmonella</i> 14028    | 22°C                          | n.s.                      |
| D184       | Polypropylene   | <i>E.coli</i> O157:H7      | 4°C                           | n.s.                      |
| D184       | Polypropylene   | <i>E.coli</i> O157:H7      | 22°C                          | n.s.                      |
| D184       | Polypropylene   | <i>Salmonella</i> cocktail | 4°C                           | n.s.                      |
| D184       | Polypropylene   | <i>Salmonella</i> cocktail | 22°C                          | <0.0001                   |
| D5431      | Polypropylene   | <i>Salmonella</i> 14028    | 4°C                           | <0.0001                   |
| D5431      | Polypropylene   | <i>Salmonella</i> 14028    | 22°C                          | <0.0001                   |
| D5431      | Polypropylene   | <i>E.coli</i> O157:H7      | 4°C                           | 0.0004                    |
| D5431      | Polypropylene   | <i>E.coli</i> O157:H7      | 22°C                          | <0.0001                   |
| D5431      | Polypropylene   | <i>Salmonella</i> cocktail | 4°C                           | <0.0001                   |
| D5431      | Polypropylene   | <i>Salmonella</i> cocktail | 22°C                          | <0.0001                   |
| M1555      | Polypropylene   | <i>Salmonella</i> 14028    | 4°C                           | n.s.                      |
| M1555      | Polypropylene   | <i>Salmonella</i> 14028    | 22°C                          | 0.0049                    |
| M1555      | Polypropylene   | <i>E.coli</i> O157:H7      | 4°C                           | n.s.                      |
| M1555      | Polypropylene   | <i>E.coli</i> O157:H7      | 22°C                          | <0.0001                   |
| M1555      | Polypropylene   | <i>Salmonella</i> cocktail | 4°C                           | 0.0185                    |
| M1555      | Polypropylene   | <i>Salmonella</i> cocktail | 22°C                          | <0.0001                   |
| MOL        | Polypropylene   | <i>Salmonella</i> 14028    | 4°C                           | <0.0001                   |
| MOL        | Polypropylene   | <i>Salmonella</i> 14028    | 22°C                          | <0.0001                   |
| MOL        | Polypropylene   | <i>E.coli</i> O157:H7      | 4°C                           | <0.0001                   |
| MOL        | Polypropylene   | <i>E.coli</i> O157:H7      | 22°C                          | n.s.                      |
| MOL        | Polypropylene   | <i>Salmonella</i> cocktail | 4°C                           | 0.0001                    |
| MOL        | Polypropylene   | <i>Salmonella</i> cocktail | 22°C                          | <0.0001                   |
| D184       | Polystyrene     | <i>Salmonella</i> 14028    | 4°C                           | n.s.                      |
| D184       | Polystyrene     | <i>Salmonella</i> 14028    | 22°C                          | n.s.                      |
| D184       | Polystyrene     | <i>E.coli</i> O157:H7      | 4°C                           | n.s.                      |
| D184       | Polystyrene     | <i>E.coli</i> O157:H7      | 22°C                          | n.s.                      |
| D184       | Polystyrene     | <i>Salmonella</i> cocktail | 4°C                           | <0.0001                   |
| D184       | Polystyrene     | <i>Salmonella</i> cocktail | 22°C                          | <0.0001                   |
| D184       | Polystyrene     | <i>Salmonella</i> 14028    | 4°C                           | <0.0001                   |
| D5431      | Polystyrene     | <i>Salmonella</i> 14028    | 22°C                          | 0.0006                    |
| D5431      | Polystyrene     | <i>E.coli</i> O157:H7      | 4°C                           | 0.0001                    |
| D5431      | Polystyrene     | <i>E.coli</i> O157:H7      | 22°C                          | n.s.                      |
| D5431      | Polystyrene     | <i>Salmonella</i> cocktail | 4°C                           | <0.0001                   |
| D5431      | Polystyrene     | <i>Salmonella</i> cocktail | 22°C                          | <0.0001                   |
| M1555      | Polystyrene     | <i>Salmonella</i> 14028    | 4°C                           | 0.0229                    |
| M1555      | Polystyrene     | <i>Salmonella</i> 14028    | 22°C                          | <0.0001                   |
| M1555      | Polystyrene     | <i>E.coli</i> O157:H7      | 4°C                           | n.s.                      |
| M1555      | Polystyrene     | <i>E.coli</i> O157:H7      | 22°C                          | n.s.                      |
| M1555      | Polystyrene     | <i>Salmonella</i> cocktail | 4°C                           | <0.0001                   |

|       |             |                            |      |         |
|-------|-------------|----------------------------|------|---------|
| M1555 | Polystyrene | <i>Salmonella</i> cocktail | 22°C | <0.0001 |
| MOL   | Polystyrene | <i>Salmonella</i> 14028    | 4°C  | 0.0465  |
| MOL   | Polystyrene | <i>Salmonella</i> 14028    | 22°C | 0.0078  |
| MOL   | Polystyrene | <i>E.coli</i> O157:H7      | 4°C  | n.s.    |
| MOL   | Polystyrene | <i>E.coli</i> O157:H7      | 22°C | n.s.    |
| MOL   | Polystyrene | <i>Salmonella</i> cocktail | 4°C  | <0.0001 |
| MOL   | Polystyrene | <i>Salmonella</i> cocktail | 22°C | <0.0001 |

\* Statistically significant effects ( $p < 0.05$ ) of the NO donor treatments. n.s., not statistically significant biofilm dispersion. MOL, Molsidomine; M1555, MAHMA NONOate; S150, SPERMINE NONOate; D5431, diethylamine NONOate diethylammonium salt; D184, diethylamine NONOate sodium; S8432 sulfo NONOate disodium salt.



**Supplementary Table S3.** The complete set of experiments on the effect of the NO donors on preformed biofilm after 6 hours of contact time.

| NO donor | Material      | Strain                     | Incubation temperature | Prob>F* |
|----------|---------------|----------------------------|------------------------|---------|
| D184     | Polypropylene | <i>Salmonella</i> 14028    | 4°C                    | <0.0001 |
| D184     | Polypropylene | <i>Salmonella</i> 14028    | 22°C                   | n.s.    |
| D184     | Polypropylene | <i>E.coli</i> O157:H7      | 4°C                    | n.s.    |
| D184     | Polypropylene | <i>E.coli</i> O157:H7      | 22°C                   | 0.0551  |
| D184     | Polypropylene | <i>Salmonella</i> cocktail | 4°C                    | n.s.    |
| D184     | Polypropylene | <i>Salmonella</i> cocktail | 22°C                   | <0.0001 |
| D5431    | Polypropylene | <i>Salmonella</i> 14028    | 4°C                    | <0.0001 |
| D5431    | Polypropylene | <i>Salmonella</i> 14028    | 22°C                   | <0.0001 |
| D5431    | Polypropylene | <i>E.coli</i> O157:H7      | 4°C                    | 0.0004  |
| D5431    | Polypropylene | <i>E.coli</i> O157:H7      | 22°C                   | <0.0001 |
| D5431    | Polypropylene | <i>Salmonella</i> cocktail | 4°C                    | <0.0001 |
| D5431    | Polypropylene | <i>Salmonella</i> cocktail | 22°C                   | <0.0001 |
| M1555    | Polypropylene | <i>Salmonella</i> 14028    | 4°C                    | n.s.    |
| M1555    | Polypropylene | <i>Salmonella</i> 14028    | 22°C                   | 0.0049  |
| M1555    | Polypropylene | <i>E.coli</i> O157:H7      | 4°C                    | n.s.    |
| M1555    | Polypropylene | <i>E.coli</i> O157:H7      | 22°C                   | <0.0001 |
| M1555    | Polypropylene | <i>Salmonella</i> cocktail | 4°C                    | n.s.    |
| M1555    | Polypropylene | <i>Salmonella</i> cocktail | 22°C                   | <0.0001 |
| MOL      | Polypropylene | <i>Salmonella</i> 14028    | 4°C                    | <0.0001 |
| MOL      | Polypropylene | <i>Salmonella</i> 14028    | 22°C                   | <0.0001 |
| MOL      | Polypropylene | <i>E.coli</i> O157:H7      | 4°C                    | <0.0001 |
| MOL      | Polypropylene | <i>E.coli</i> O157:H7      | 22°C                   | n.s.    |
| MOL      | Polypropylene | <i>Salmonella</i> cocktail | 4°C                    | 0.0001  |
| MOL      | Polypropylene | <i>Salmonella</i> cocktail | 22°C                   | <0.0001 |
| S150     | Polypropylene | <i>Salmonella</i> 14028    | 4°C                    | n.s.    |
| S150     | Polypropylene | <i>Salmonella</i> 14028    | 22°C                   | n.s.    |
| S150     | Polypropylene | <i>E.coli</i> O157:H7      | 4°C                    | 0.0273  |
| S150     | Polypropylene | <i>E.coli</i> O157:H7      | 22°C                   | 0.0486  |
| S150     | Polypropylene | <i>Salmonella</i> cocktail | 4°C                    | 0.0036  |
| S150     | Polypropylene | <i>Salmonella</i> cocktail | 22°C                   | 0.0003  |
| D184     | Polystyrene   | <i>Salmonella</i> 14028    | 4°C                    | n.s.    |
| D184     | Polystyrene   | <i>Salmonella</i> 14028    | 22°C                   | n.s.    |
| D184     | Polystyrene   | <i>E.coli</i> O157:H7      | 4°C                    | n.s.    |
| D184     | Polystyrene   | <i>E.coli</i> O157:H7      | 22°C                   | n.s.    |
| D184     | Polystyrene   | <i>Salmonella</i> cocktail | 4°C                    | <0.0001 |
| D184     | Polystyrene   | <i>Salmonella</i> cocktail | 22°C                   | <0.0001 |
| D5431    | Polystyrene   | <i>Salmonella</i> 14028    | 4°C                    | <0.0001 |
| D5431    | Polystyrene   | <i>Salmonella</i> 14028    | 22°C                   | 0.0006  |
| D5431    | Polystyrene   | <i>E.coli</i> O157:H7      | 4°C                    | 0.0001  |
| D5431    | Polystyrene   | <i>E.coli</i> O157:H7      | 22°C                   | n.s.    |

|       |             |                            |      |         |
|-------|-------------|----------------------------|------|---------|
| D5431 | Polystyrene | <i>Salmonella</i> cocktail | 4°C  | <0.0001 |
| D5431 | Polystyrene | <i>Salmonella</i> cocktail | 22°C | <0.0001 |
| M1555 | Polystyrene | <i>Salmonella</i> 14028    | 4°C  | 0.0229  |
| M1555 | Polystyrene | <i>Salmonella</i> 14028    | 22°C | <0.0001 |
| M1555 | Polystyrene | <i>E.coli</i> O157:H7      | 4°C  | n.s.    |
| M1555 | Polystyrene | <i>E.coli</i> O157:H7      | 22°C | n.s.    |
| M1555 | Polystyrene | <i>Salmonella</i> cocktail | 4°C  | 0.0184  |
| M1555 | Polystyrene | <i>Salmonella</i> cocktail | 22°C | <0.0001 |
| MOL   | Polystyrene | <i>Salmonella</i> 14028    | 4°C  | <0.0001 |
| MOL   | Polystyrene | <i>Salmonella</i> 14028    | 22°C | 0.0078  |
| MOL   | Polystyrene | <i>E.coli</i> O157:H7      | 4°C  | n.s.    |
| MOL   | Polystyrene | <i>E.coli</i> O157:H7      | 22°C | n.s.    |
| MOL   | Polystyrene | <i>Salmonella</i> cocktail | 4°C  | <0.0001 |
| MOL   | Polystyrene | <i>Salmonella</i> cocktail | 22°C | <0.0001 |
| S150  | Polystyrene | <i>Salmonella</i> 14028    | 4°C  | 0.0418  |
| S150  | Polystyrene | <i>Salmonella</i> 14028    | 22°C | n.s.    |
| S150  | Polystyrene | <i>E.coli</i> O157:H7      | 4°C  | n.s.    |
| S150  | Polystyrene | <i>E.coli</i> O157:H7      | 22°C | n.s.    |
| S150  | Polystyrene | <i>Salmonella</i> cocktail | 4°C  | n.s.    |
| S150  | Polystyrene | <i>Salmonella</i> cocktail | 22°C | 0.0183  |

\* Statistically significant effects ( $p < 0.05$ ) of the NO donor treatments. n.s., not statistically significant biofilm dispersion. MOL, Molsidomine; M1555, MAHMA NONOate; S150, SPERMINE NONOate; D5431, diethylamine NONOate diethylammonium salt; D184, diethylamine NONOate sodium; S8432 sulfo NONOate disodium salt.
